# Supplementary material for: Mental health in individuals with spinal cord injury: The role of socioeconomic conditions and social relationships
Source: PubMed Central journal article supplement (PMC6382129; doi:10.1371/journal.pone.0206069), 2019-02-20
Supplement: pone.0206069.s001.pdf [file pone.0206069.s001.pdf]

# Supporting information

## S1 File. Sensitivity analyses.

**Table A.** Sensitivity analyses of associations of socioeconomic conditions with structural and functional aspects of social relationships, odds ratios (OR) and 95% confidence intervals (95% CI) of logistic regressions comparing four data scenarios, each with an unweighted (u) and a weighted (w) model.

|                                                      |                | Structural aspects of social relationships |                            |                              | Functional aspects of social relationships      |                                               |                                              |                                               |                         |
|------------------------------------------------------|----------------|--------------------------------------------|----------------------------|------------------------------|-------------------------------------------------|-----------------------------------------------|----------------------------------------------|-----------------------------------------------|-------------------------|
|                                                      |                | Not having a partner                       | Infrequent social contacts | Few supportive relationships | Less than satisfied with overall social support | Less than satisfied with family relationships | Less than satisfied with contacts to friends | Less than satisfied with partner relationship |                         |
|                                                      |                | OR (95% CI)                                | OR (95% CI)                | OR (95% CI)                  | OR (95% CI)                                     | OR (95% CI)                                   | OR (95% CI)                                  | OR (95% CI)                                   |                         |
| <b>Years of formal education (per year)</b>          |                |                                            |                            |                              |                                                 |                                               |                                              |                                               |                         |
| Scenario 1                                           | u              | 0.98 (0.92-1.04)                           | 0.95 (0.88-1.02)           | 1.00 (0.94-1.07)             | 0.94 (0.83-1.06)                                | 1.04 (0.96-1.12)                              | 1.06 (0.98-1.15)                             | 0.99 (0.89-1.09)                              |                         |
|                                                      | w              | 0.97 (0.92-1.03)                           | 0.95 (0.88-1.02)           | 1.00 (0.92-1.08)             | 0.92 (0.81-1.03)                                | 1.04 (0.95-1.13)                              | 1.05 (0.95-1.16)                             | 1.00 (0.90-1.11)                              |                         |
| Scenario 2                                           | u              | 0.97 (0.92-1.04)                           | 0.93 (0.86-1.01)           | 1.00 (0.93-1.07)             | 0.95 (0.84-1.08)                                | 1.04 (0.96-1.13)                              | 1.05 (0.97-1.14)                             | 1.00 (0.90-1.11)                              |                         |
|                                                      | w              | 0.97 (0.91-1.03)                           | 0.94 (0.87-1.01)           | 1.00 (0.92-1.08)             | 0.92 (0.81-1.05)                                | 1.05 (0.96-1.15)                              | 1.04 (0.94-1.15)                             | 1.01 (0.91-1.13)                              |                         |
| Scenario 3                                           | u              | 0.98 (0.92-1.04)                           | 0.95 (0.88-1.02)           | 1.00 (0.94-1.07)             | 1.04 (0.96-1.12)                                | 1.07 (0.99-1.15)                              | 1.00 (0.92-1.10)                             | 0.98 (0.92-1.04)                              |                         |
|                                                      | w              | 0.97 (0.92-1.04)                           | 0.95 (0.88-1.02)           | 1.00 (0.93-1.08)             | 1.04 (0.96-1.14)                                | 1.05 (0.95-1.16)                              | 1.02 (0.93-1.12)                             | 0.97 (0.92-1.04)                              |                         |
| Scenario 4                                           | u              | 0.97 (0.92-1.03)                           | 0.95 (0.89-1.01)           | 1.00 (0.94-1.06)             | 0.97 (0.89-1.06)                                | 1.01 (0.95-1.09)                              | 1.03 (0.96-1.11)                             | 0.97 (0.92-1.03)                              |                         |
|                                                      | w              | 0.97 (0.92-1.03)                           | 0.95 (0.89-1.02)           | 0.99 (0.93-1.06)             | 0.95 (0.85-1.05)                                | 1.01 (0.94-1.09)                              | 1.02 (0.94-1.11)                             | 0.98 (0.92-1.03)                              |                         |
| <b>Net-equivalent household income (in CHF 1000)</b> |                |                                            |                            |                              |                                                 |                                               |                                              |                                               |                         |
| Scenario 1                                           | u              | 1.15 (1.03-1.28)*                          | 0.86 (0.74-0.99)*          | <b>0.88 (0.77-1.00)</b>      | 0.98 (0.79-1.22)                                | 0.95 (0.82-1.10)                              | 1.00 (0.87-1.16)                             | <b>0.82 (0.66-1.01)</b>                       |                         |
|                                                      | w              | 1.13 (1.00-1.26)*                          | 0.83 (0.71-0.99)*          | 0.86 (0.75-0.99)*            | 0.98 (0.77-1.25)                                | 0.95 (0.82-1.11)                              | 1.00 (0.85-1.16)                             | 0.81 (0.67-0.98)*                             |                         |
| Scenario 2                                           | u              | 1.18 (1.05-1.32)**                         | 0.83 (0.71-0.96)*          | 0.87 (0.75-1.00)*            | 0.99 (0.79-1.24)                                | 0.97 (0.83-1.12)                              | 1.00 (0.86-1.16)                             | <b>0.84 (0.67-1.05)</b>                       |                         |
|                                                      | w              | 1.15 (1.02-1.30)*                          | 0.82 (0.69-0.99)*          | 0.87 (0.75-0.99)*            | 0.99 (0.76-1.28)                                | 0.98 (0.84-1.14)                              | 0.99 (0.84-1.16)                             | <b>0.84 (0.68-1.03)</b>                       |                         |
| Scenario 3                                           | u              | 1.14 (1.02-1.27)*                          | 0.86 (0.75-0.99)*          | <b>0.89 (0.78-1.02)</b>      | 0.96 (0.83-1.11)                                | 1.01 (0.87-1.17)                              | <b>0.81 (0.68-0.96)*</b>                     | 1.14 (1.02-1.27)*                             |                         |
|                                                      | w              | <b>1.12 (0.99-1.26)</b>                    | <b>0.86 (0.73-1.00)</b>    | <b>0.90 (0.79-1.02)</b>      | 0.97 (0.83-1.12)                                | 1.00 (0.86-1.17)                              | <b>0.81 (0.70-0.94)*</b>                     | 1.12 (0.99-1.26)**                            |                         |
| Scenario 4                                           | u              | 1.14 (1.03-1.27)*                          | 0.88 (0.77-0.99)*          | 0.87 (0.77-0.98)*            | 0.87 (0.73-1.04)                                | 0.94 (0.83-1.07)                              | 1.00 (0.87-1.14)                             | <b>1.04 (0.94-1.16)</b>                       |                         |
|                                                      | w              | <b>1.12 (1.00-1.26)</b>                    | <b>0.87 (0.76-1.00)</b>    | <b>0.85 (0.76-0.96)</b>      | 0.85 (0.70-1.03)                                | 0.94 (0.81-1.08)                              | 0.98 (0.85-1.12)                             | <b>1.03 (0.93-1.14)</b>                       |                         |
| <b>Financial strain</b>                              |                |                                            |                            |                              |                                                 |                                               |                                              |                                               |                         |
| No strain (Reference)                                |                | 1.00                                       | 1.00                       | 1.00                         | 1.00                                            | 1.00                                          | 1.00                                         | 1.00                                          |                         |
| Scenario 1                                           |                |                                            |                            |                              |                                                 |                                               |                                              |                                               |                         |
|                                                      | Slight strain  | u                                          | <b>1.66 (1.02-2.70)*</b>   | 1.24 (0.72-2.14)             | 1.07 (0.61-1.88)                                | 1.56 (0.62-3.88)                              | <b>2.11 (1.13-3.94)*</b>                     | <b>1.87 (1.01-3.45)*</b>                      | 2.27 (1.03-5.01)*       |
|                                                      | Massive strain | u                                          | 1.44 (0.70-2.96)           | 1.44 (0.65-3.19)             | 2.07 (0.91-4.69)                                | 6.13 (2.10-17.90)**                           | 6.25 (2.80-13.92)***                         | 3.29 (1.49-7.31)**                            | 6.40 (2.15-19.05)**     |
|                                                      | Slight strain  | w                                          | 1.48 (0.91-2.41)           | 1.23 (0.72-2.09)             | 1.08 (0.61-1.92)                                | 1.42 (0.59-3.41)                              | 1.69 (0.87-3.28)                             | 1.50 (0.80-2.83)                              | 2.37 (1.12-5.08)*       |
|                                                      | Massive strain | w                                          | 1.38 (0.69-2.74)           | 1.64 (0.72-3.70)             | 2.25 (0.98-5.12)                                | 5.18 (1.90-14.09)**                           | 5.84 (2.59-13.17)***                         | 3.15 (1.42-6.99)**                            | 8.46 (2.87-24.94)***    |
| Scenario 2                                           |                |                                            |                            |                              |                                                 |                                               |                                              |                                               |                         |
|                                                      | Slight strain  | u                                          | 1.57 (0.95-2.91)           | 1.23 (0.68-2.20)             | 1.04 (0.58-1.89)                                | 1.23 (0.46-3.30)                              | <b>2.35 (1.20-4.60)*</b>                     | <b>2.09 (1.10-3.96)*</b>                      | 2.53 (1.10-5.84)*       |
|                                                      | Massive strain | u                                          | 1.36 (0.64-2.90)           | 1.23 (0.53-2.89)             | 2.11 (0.92-4.83)                                | 6.57 (2.17-19.93)**                           | 7.99 (3.38-18.84)***                         | 3.36 (1.45-7.78)**                            | 7.70 (2.54-23.32)***    |
|                                                      | Slight strain  | w                                          | 1.71 (1.00-2.91)           | 1.04 (0.57-1.88)             | 0.91 (0.48-1.72)                                | 1.11 (0.40-3.06)                              | 1.84 (0.88-3.86)                             | 1.72 (0.97-3.41)                              | 2.40 (1.06-5.45)*       |
|                                                      | Massive strain | w                                          | 1.63 (0.76-3.53)           | 1.14 (0.48-2.72)             | 1.96 (0.80-4.76)                                | 5.90 (1.84-18.92)**                           | 7.25 (2.97-17.71)***                         | 3.16 (1.30-7.71)*                             | 9.00 (3.01-26.95)***    |
| Scenario 3                                           |                |                                            |                            |                              |                                                 |                                               |                                              |                                               |                         |
|                                                      | Slight strain  | u                                          | <b>1.75 (1.08-2.85)*</b>   | 1.29 (0.75-2.22)             | 1.13 (0.64-1.97)                                | 1.58 (0.64-3.91)                              | <b>2.10 (1.13-3.91)*</b>                     | <b>1.88 (1.02-3.46)*</b>                      | <b>1.80 (0.87-3.73)</b> |
|                                                      | Massive strain | u                                          | 1.50 (0.73-3.07)           | 1.48 (0.68-3.22)             | 1.98 (0.91-4.32)                                | 4.89 (1.74-13.73)**                           | 6.17 (2.79-13.64)***                         | 3.31 (1.51-7.25)**                            | 3.43 (1.30-9.07)*       |
|                                                      | Slight strain  | w                                          | <b>1.86 (1.12-3.09)*</b>   | 1.13 (0.65-1.97)             | 0.98 (0.54-1.79)                                | 1.43 (0.56-3.69)                              | 1.77 (0.89-3.52)                             | 1.58 (0.82-3.04)                              | <b>1.73 (0.84-3.56)</b> |
|                                                      | Massive strain | w                                          | 1.74 (0.85-3.64)           | 1.43 (0.64-3.18)             | 1.71 (0.75-4.03)                                | 4.02 (1.30-12.40)*                            | 6.06 (2.63-13.94)***                         | 3.32 (1.43-7.70)**                            | 3.55 (1.32-9.50)*       |
| Scenario 4                                           |                |                                            |                            |                              |                                                 |                                               |                                              |                                               |                         |
|                                                      | Slight strain  | u                                          | 1.38 (0.86-2.21)           | 1.14 (0.68-1.94)             | 0.93 (0.56-1.53)                                | 1.47 (0.71-3.06)                              | <b>2.06 (1.17-3.65)*</b>                     | 1.60 (0.89-2.85)                              | 1.58 (1.00-2.49)*       |
|                                                      | Massive strain | u                                          | 1.23 (0.64-2.56)           | 1.35 (0.62-2.94)             | 1.74 (0.84-3.60)                                | 6.01 (2.20-14.42)***                          | 4.97 (2.31-10.55)***                         | 2.73 (1.24-5.97)*                             | 2.25 (1.58-6.70)**      |
|                                                      | Slight strain  | w                                          | 1.48 (0.90-2.43)           | 1.02 (0.59-1.76)             | 0.88 (0.52-1.49)                                | 1.50 (0.70-3.21)                              | 1.74 (0.94-3.20)                             | 1.33 (0.72-2.47)                              | <b>1.56 (0.97-2.50)</b> |
|                                                      | Massive strain | w                                          | 1.53 (0.75-3.12)           | 1.36 (0.60-3.10)             | 1.79 (0.84-3.79)                                | 6.76 (2.77-16.47)***                          | 4.77 (2.13-10.69)***                         | 2.71 (1.20-6.11)*                             | 3.66 (1.71-7.80)**      |

\*  $p \leq 0.05$ , \*\*  $p \leq 0.01$ , \*\*\*  $p \leq 0.001$ .  $P$  values from unrestricted fraction missing information tests for scenario 1, 3, and 4.  $P$  values from Wald  $\chi^2$  tests for scenario 2.

*Scenario 1*: Multiply imputed data for predictors and control variables, outcome variables full case; *Scenario 2*: Full cases for all included variables; *Scenario 3*: Multiply imputed data for predictors and control variables, replacement of missing values in outcomes by 'best case' values; *Scenario 4*: Multiply imputed data for predictors and control variables, replacement of missing values in outcomes by 'worst case' values.

*Notes*: All analyses adjusted for control variables (sex, age, level and degree of lesion, etiology, time since injury, chronic pain, paid employment). Not mutually adjusted for other socioeconomic variables. Weighted analyses conducted with inverse probability weights. **Bold** results indicate deviations from the weighted scenario 1 (main results displayed in Table 2).

**Table B.** Sensitivity analyses of associations of socioeconomic conditions and social relationships with mental health problems, odds ratios (OR) and 95% confidence intervals (95% CI) of logistic regressions comparing four data scenarios, each with an unweighted (u) and a weighted (w) model.

|                                                                  |                                             |                     | General mental health problems<br>(MHI-5 score $\leq 6$ ) | Depressive symptomatology<br>(HADS-D score $\geq 8$ ) |                          |
|------------------------------------------------------------------|---------------------------------------------|---------------------|-----------------------------------------------------------|-------------------------------------------------------|--------------------------|
|                                                                  |                                             |                     | OR (95% CI)                                               | OR (95% CI)                                           |                          |
| <b>Years of formal education (per year)<sup>a</sup></b>          | Scenario 1                                  | u                   | 1.04 (0.96-1.12)                                          | 0.98 (0.91-1.06)                                      |                          |
|                                                                  |                                             | w                   | 1.03 (0.95-1.12)                                          | 0.98 (0.91-1.05)                                      |                          |
|                                                                  | Scenario 2                                  | u                   | 1.05 (0.96-1.14)                                          | 1.00 (0.92-1.10)                                      |                          |
|                                                                  |                                             | w                   | 1.04 (0.96-1.14)                                          | 1.01 (0.92-1.10)                                      |                          |
|                                                                  | Scenario 3                                  | u                   | 1.04 (0.97-1.13)                                          | 0.99 (0.91-1.06)                                      |                          |
|                                                                  |                                             | w                   | 1.04 (0.96-1.12)                                          | 0.99 (0.91-1.07)                                      |                          |
|                                                                  | Scenario 4                                  | u                   | 1.03 (0.96-1.10)                                          | 0.96 (0.89-1.04)                                      |                          |
|                                                                  |                                             | w                   | 1.03 (0.96-1.10)                                          | 0.97 (0.89-1.04)                                      |                          |
| <b>Net-equivalent household income (in CHF 1000)<sup>a</sup></b> | Scenario 1                                  | u                   | 1.00 (0.87-1.15)                                          | 0.92 (0.80-1.07)                                      |                          |
|                                                                  |                                             | w                   | 1.00 (0.87-1.15)                                          | 0.90 (0.77-1.05)                                      |                          |
|                                                                  | Scenario 2                                  | u                   | 1.00 (0.85-1.16)                                          | 0.91 (0.78-1.08)                                      |                          |
|                                                                  |                                             | w                   | 1.00 (0.85-1.18)                                          | 0.89 (0.75-1.06)                                      |                          |
|                                                                  | Scenario 3                                  | u                   | 1.02 (0.88-1.17)                                          | 0.94 (0.81-1.08)                                      |                          |
|                                                                  |                                             | w                   | 1.02 (0.88-1.18)                                          | 0.92 (0.79-1.07)                                      |                          |
|                                                                  | Scenario 4                                  | u                   | 0.94 (0.83-1.07)                                          | 0.90 (0.79-1.04)                                      |                          |
|                                                                  |                                             | w                   | 0.94 (0.83-1.06)                                          | 0.88 (0.76-1.02)                                      |                          |
| <b>Financial strain<sup>a</sup></b>                              | No financial strain                         | Reference           | 1.00                                                      | 1.00                                                  |                          |
|                                                                  | Slight strain                               | Scenario 1          | u                                                         | 1.44 (0.79-2.61)                                      | 1.91 (1.10-3.34)*        |
|                                                                  |                                             |                     | w                                                         | 2.83 (1.26-6.38)*                                     | <b>2.04 (0.90-4.59)</b>  |
|                                                                  | Massive strain                              | Scenario 2          | u                                                         | 1.50 (0.80-2.80)                                      | 2.13 (1.18-3.85)*        |
|                                                                  |                                             |                     | w                                                         | 3.11 (1.34-7.23)**                                    | 2.47 (1.13-5.41)*        |
|                                                                  | Slight strain                               | Scenario 2          | u                                                         | 1.73 (0.91-3.27)                                      | 2.28 (1.22-4.27)*        |
|                                                                  |                                             |                     | w                                                         | 2.72 (0.93-3.40)*                                     | <b>2.07 (0.81-5.27)</b>  |
|                                                                  | Massive strain                              | Scenario 2          | u                                                         | 1.77 (0.90-3.47)                                      | 2.43 (1.27-4.66)**       |
|                                                                  |                                             |                     | w                                                         | 2.89 (1.09-7.66)*                                     | <b>2.23 (0.94-5.30)</b>  |
|                                                                  | Slight strain                               | Scenario 3          | u                                                         | 1.39 (0.78-2.49)                                      | 1.89 (1.09-3.28)*        |
|                                                                  |                                             |                     | w                                                         | 2.71 (1.24-5.91)*                                     | <b>1.92 (0.87-4.26)</b>  |
|                                                                  | Massive strain                              | Scenario 3          | u                                                         | 1.45 (0.79-2.67)                                      | 2.07 (1.17-3.68)*        |
|                                                                  |                                             |                     | w                                                         | 3.07 (1.37-6.88)**                                    | 2.34 (1.09-5.03)*        |
|                                                                  | Slight strain                               | Scenario 4          | u                                                         | 1.64 (0.98-2.74)                                      | 1.87 (1.10-3.17)*        |
|                                                                  |                                             |                     | w                                                         | 2.73 (1.31-5.70)**                                    | 2.48 (1.15-5.36)*        |
|                                                                  | Massive strain                              | Scenario 4          | u                                                         | 1.68 (0.98-2.87)                                      | 2.17 (1.24-3.79)*        |
| w                                                                |                                             |                     | 2.78 (1.32-5.88)**                                        | 2.98 (1.38-6.41)**                                    |                          |
| <b>Partner status<sup>b</sup></b>                                | Having a partner                            | Reference           | 1.00                                                      | 1.00                                                  |                          |
|                                                                  | Not having a partner                        | Scenario 1          | u                                                         | 1.56 (0.95-2.57)                                      | 1.72 (1.04-2.84)*        |
|                                                                  |                                             |                     | w                                                         | 1.62 (0.96-2.72)                                      | 2.04 (1.22-3.42)**       |
|                                                                  | Scenario 2                                  | u                   | 1.61 (0.95-2.73)                                          | <b>1.68 (0.98-2.89)</b>                               |                          |
|                                                                  |                                             | w                   | 1.58 (0.92-2.73)                                          | 2.03 (1.16-3.57)*                                     |                          |
|                                                                  | Scenario 3                                  | u                   | 1.45 (0.89-2.37)                                          | 1.67 (1.02-2.75)*                                     |                          |
|                                                                  |                                             | w                   | 1.52 (0.91-2.53)                                          | 1.97 (1.18-3.29)**                                    |                          |
|                                                                  | Scenario 4                                  | u                   | 1.47 (0.95-2.27)                                          | 1.63 (1.01-2.64)*                                     |                          |
|                                                                  |                                             | w                   | 1.48 (0.94-2.32)                                          | 1.92 (1.17-3.16)**                                    |                          |
|                                                                  | <b>Social contact frequency<sup>b</sup></b> | Scenario 1          | u                                                         | 0.89 (0.83-0.96)**                                    | 0.94 (0.88-1.01)         |
|                                                                  |                                             |                     | w                                                         | 0.87 (0.81-0.94)***                                   | 0.95 (0.88-1.03)         |
|                                                                  |                                             | Scenario 2          | u                                                         | 0.90 (0.83-0.97)**                                    | 0.95 (0.87-1.02)         |
|                                                                  |                                             |                     | w                                                         | 0.87 (0.81-0.95)***                                   | 0.96 (0.88-1.04)         |
|                                                                  |                                             | Scenario 3          | u                                                         | 0.90 (0.84-0.97)**                                    | 0.94 (0.88-1.01)         |
|                                                                  |                                             |                     | w                                                         | 0.88 (0.82-0.95)***                                   | 0.96 (0.88-1.04)         |
|                                                                  |                                             | Scenario 4          | u                                                         | 0.92 (0.86-0.97)**                                    | 0.94 (0.88-1.01)         |
| w                                                                |                                             |                     | 0.91 (0.85-0.97)**                                        | 0.94 (0.88-1.02)                                      |                          |
| <b>Number of supportive relationships<sup>b</sup></b>            | Scenario 1                                  | u                   | <b>0.85 (0.72-1.00)</b>                                   | 0.75 (0.64-0.89)**                                    |                          |
|                                                                  |                                             | w                   | 0.83 (0.70-0.98)*                                         | 0.75 (0.63-0.89)**                                    |                          |
|                                                                  | Scenario 2                                  | u                   | <b>0.85 (0.71-1.01)</b>                                   | 0.73 (0.60-0.89)**                                    |                          |
|                                                                  |                                             | w                   | 0.82 (0.70-0.97)*                                         | 0.73 (0.61-0.88)**                                    |                          |
|                                                                  | Scenario 3                                  | u                   | 0.85 (0.73-1.00)*                                         | 0.76 (0.65-0.90)**                                    |                          |
|                                                                  |                                             | w                   | 0.83 (0.71-0.97)*                                         | 0.76 (0.64-0.90)**                                    |                          |
|                                                                  | Scenario 4                                  | u                   | <b>0.90 (0.78-1.03)</b>                                   | 0.76 (0.64-0.89)**                                    |                          |
|                                                                  |                                             | w                   | <b>0.90 (0.78-1.03)</b>                                   | 0.75 (0.63-0.89)**                                    |                          |
| <b>Satisfaction with overall social support<sup>b</sup></b>      | Satisfied                                   | Reference           | 1.00                                                      | 1.00                                                  |                          |
|                                                                  | Less than satisfied                         | Scenario 1          | u                                                         | <b>2.55 (1.08-6.03)*</b>                              | <b>2.35 (1.08-6.03)*</b> |
|                                                                  |                                             |                     | w                                                         | 2.46 (0.95-6.37)                                      | 2.25 (0.95-5.32)         |
|                                                                  | Scenario 2                                  | u                   | 2.18 (0.92-5.17)                                          | <b>3.11 (1.30-7.40)*</b>                              |                          |
|                                                                  |                                             | w                   | 2.12 (0.82-5.45)                                          | <b>2.62 (1.08-6.37)*</b>                              |                          |
|                                                                  | Scenario 3                                  | u                   | <b>2.67 (1.18-6.09)*</b>                                  | <b>2.54 (1.13-5.75)*</b>                              |                          |
|                                                                  |                                             | w                   | <b>2.62 (1.06-6.44)*</b>                                  | 2.28 (0.97-5.39)                                      |                          |
|                                                                  | Scenario 4                                  | u                   | 1.83 (0.82-4.08)                                          | 2.17 (0.97-4.83)                                      |                          |
| w                                                                |                                             | 1.75 (0.72-4.25)    | 1.97 (0.84-4.63)                                          |                                                       |                          |
| <b>Satisfaction with family relationships<sup>b</sup></b>        | Satisfied                                   | Reference           | 1.00                                                      | 1.00                                                  |                          |
|                                                                  | Less than satisfied                         | Scenario 1          | u                                                         | 2.92 (1.62-5.27)***                                   | 2.44 (1.37-4.34)**       |
|                                                                  |                                             |                     | w                                                         | 3.21 (1.72-6.00)***                                   | 2.82 (1.56-5.07)***      |
|                                                                  | Scenario 2                                  | u                   | 3.02 (1.60-5.69)***                                       | 2.73 (1.44-5.18)**                                    |                          |
|                                                                  |                                             | w                   | 3.43 (1.76-6.70)***                                       | 2.99 (1.57-5.72)***                                   |                          |
|                                                                  | Scenario 3                                  | u                   | 2.78 (1.57-4.93)***                                       | 2.37 (1.33-4.20)**                                    |                          |
|                                                                  |                                             | w                   | 2.94 (1.59-5.43)***                                       | 2.49 (1.38-4.51)**                                    |                          |
|                                                                  | Scenario 4                                  | u                   | 2.34 (1.36-4.04)**                                        | 2.31 (1.32-4.04)**                                    |                          |
| w                                                                |                                             | 2.68 (1.51-4.74)*** | 2.52 (1.42-4.45)**                                        |                                                       |                          |

| <b>Satisfaction with contacts to friends<sup>b</sup></b>    |            |   |                      |                          |
|-------------------------------------------------------------|------------|---|----------------------|--------------------------|
| Satisfied                                                   | Reference  |   | 1.00                 | 1.00                     |
| Less than satisfied                                         | Scenario 1 | u | 4.68 (2.66-8.24)***  | 3.39 (1.93-5.95)***      |
|                                                             |            | w | 5.89 (3.27-10.62)*** | 3.58 (2.01-6.36)***      |
|                                                             | Scenario 2 | u | 5.74 (3.12-10.54)*** | 4.12 (2.22-7.65)***      |
|                                                             |            | w | 7.58 (4.07-14.13)*** | 4.16 (2.23-7.78)***      |
|                                                             | Scenario 3 | u | 4.55 (2.63-7.86)***  | 3.29 (1.88-5.75)***      |
|                                                             |            | w | 5.56 (3.15-9.84)***  | 3.34 (1.87-5.96)***      |
|                                                             | Scenario 4 | u | 3.53 (2.06-6.06)***  | 3.24 (1.88-5.58)***      |
|                                                             |            | w | 4.27 (2.36-7.75)***  | 3.31 (1.88-5.84)***      |
| <b>Satisfaction with partner relationship<sup>b,c</sup></b> |            |   |                      |                          |
| Satisfied                                                   | Reference  |   | 1.00                 | 1.00                     |
| Less than satisfied                                         | Scenario 1 | u | 5.71 (2.50-13.04)*** | 2.01 (0.91-4.47)         |
|                                                             |            | w | 5.53 (2.44-12.51)*** | 2.20 (0.98-4.96)         |
|                                                             | Scenario 2 | u | 6.44 (2.60-15.93)*** | <b>2.69 (1.11-6.52)*</b> |
|                                                             |            | w | 5.91 (2.36-14.78)*** | <b>2.71 (1.09-6.71)*</b> |
|                                                             | Scenario 3 | u | 5.28 (2.38-11.71)*** | 1.87 (0.85-4.14)         |
|                                                             |            | w | 4.86 (2.19-10.76)*** | 1.90 (0.85-4.26)         |
|                                                             | Scenario 4 | u | 3.93 (1.90-8.15)***  | 2.08 (0.98-4.39)         |
|                                                             |            | w | 3.75 (1.77-7.92)***  | 2.15 (0.99-4.66)         |

\*  $p \leq 0.05$ , \*\*  $p \leq 0.01$ , \*\*\*  $p \leq 0.001$ .  $P$  values from unrestricted fraction missing information tests for scenario 1, 3, and 4.  $P$  values from Wald  $\chi^2$  tests for scenario 2.

*Scenario 1*: Multiply imputed data for predictors and control variables, outcome variables full case; *Scenario 2*: Full cases for all included variables; *Scenario 3*: Multiply imputed data for predictors and control variables, replacement of missing values in outcomes by 'best case' values; *Scenario 4*: Multiply imputed data for predictors and control variables, replacement of missing values in outcomes by 'worst case' values.

<sup>a</sup> Adjusted for partner status, social contact frequency, number of supportive relationships, satisfaction with overall social support, with family relationships, with contacts to friends, and control variables (sex, age, level and degree of lesion, etiology, time since injury, chronic pain, paid employment). Not mutually adjusted for other socioeconomic variables.

<sup>b</sup> Adjusted for education, income, financial strain, and control variables. Not mutually adjusted for other social relationship variables.

<sup>c</sup> Subgroup analyses: Including only participants having a partner.

*Note*: Weighted analyses conducted with inverse probability weights. **Bold** results indicate deviations from the weighted scenario 1 (main results displayed in Table 3).

*Abbreviations*: *HADS-D*: Hospital Anxiety and Depression Scale, depression subscale; *MHI-5*: 5-item Mental Health Inventory of SF-36.

**Table C.** Sensitivity analyses of associations of socioeconomic conditions and social relationships with mental health, coefficients and 95% confidence intervals (95% CI) of tobit regressions.

|                                                       |           | General mental health<br>(MHI-5 score 0-100, higher values =<br>better mental health) | Depressive symptomatology<br>(HADS-D score 0-21, higher values =<br>more depressive symptoms) |
|-------------------------------------------------------|-----------|---------------------------------------------------------------------------------------|-----------------------------------------------------------------------------------------------|
| Effect sizes                                          |           | Coefficient (95% CI)                                                                  | Coefficient (95% CI)                                                                          |
| Number of observations                                |           | 456                                                                                   | 498                                                                                           |
| <b>Socioeconomic conditions</b>                       |           |                                                                                       |                                                                                               |
| <b>Years of formal education</b> (per year)           | Model 1   | 0.14 (-0.51-0.80)                                                                     | -0.06 (-0.19-0.06)                                                                            |
|                                                       | Model 2   | 0.01 (-0.61-0.63)                                                                     | -0.00 (-0.13-0.12)                                                                            |
|                                                       | Model 3a  | -0.03 (-0.53-0.48)                                                                    | 0.00 (-0.11-0.11)                                                                             |
| <b>Net-equivalent household income</b> (per CHF 1000) | Model 1   | 0.62 (-0.33-1.58)                                                                     | <b>-0.18 (-0.41-0.05)</b>                                                                     |
|                                                       | Model 2   | 0.31 (-0.65-1.27)                                                                     | -0.11 (-0.33-0.11)                                                                            |
|                                                       | Model 3a  | 0.21 (-0.69-1.11)                                                                     | -0.10 (-0.31-0.11)                                                                            |
| <b>Financial strain</b>                               |           |                                                                                       |                                                                                               |
| No financial strain                                   | Reference | 0.00                                                                                  | 0.00                                                                                          |
| Slight strain                                         | Model 1   | -7.90 (-12.20- -3.61)***                                                              | 1.73 (0.76-2.69)***                                                                           |
| Massive strain                                        |           | -19.34 (-25.97- -12.72)***                                                            | 3.38 (1.98-4.78)***                                                                           |
| Slight strain                                         | Model 2   | <b>-7.04 (-11.17- -2.91)**</b>                                                        | 1.55 (0.60-2.49)**                                                                            |
| Massive strain                                        |           | -17.67 (-24.24- -11.09)***                                                            | 3.18 (1.87-4.49)***                                                                           |
| Slight strain                                         | Model 3a  | <b>-5.63 (-9.43- -1.83)**</b>                                                         | 1.20 (0.31-2.09)**                                                                            |
| Massive strain                                        |           | -11.67 (-17.75- -5.59)***                                                             | 1.88 (0.69-3.06)**                                                                            |
| <b>Structural aspects of social relationships</b>     |           |                                                                                       |                                                                                               |
| <b>Partner status</b>                                 |           |                                                                                       |                                                                                               |
| Having a partner                                      | Reference | 0.00                                                                                  | 0.00                                                                                          |
| Not having a partner                                  | Model 1   | -6.35 (-10.22--2.48)**                                                                | 1.33 (0.44-2.21)**                                                                            |
|                                                       | Model 2   | -6.49 (-10.26--2.71)**                                                                | 1.60 (0.77-2.44)***                                                                           |
|                                                       | Model 3b  | <b>-5.68 (-9.25--2.12)**</b>                                                          | 1.47 (0.66-2.28)***                                                                           |
| <b>Social contacts frequency</b>                      | Model 1   | 0.88 (0.37-1.39)**                                                                    | <b>-0.19 (-0.31--0.07)**</b>                                                                  |
|                                                       | Model 2   | 0.93 (0.44-1.42)***                                                                   | <b>-0.14 (-0.26--0.02)*</b>                                                                   |
|                                                       | Model 3b  | 0.90 (0.44-1.35)***                                                                   | <b>-0.13 (-0.25--0.01)*</b>                                                                   |
| <b>Number of supportive relationships</b>             | Model 1   | 1.87 (0.83-2.91)**                                                                    | -0.55 (-0.76--0.34)***                                                                        |
|                                                       | Model 2   | 1.92 (0.87-2.98)**                                                                    | -0.47 (-0.67--0.27)***                                                                        |
|                                                       | Model 3b  | 1.78 (0.72-2.84)**                                                                    | -0.44 (-0.64--0.23)***                                                                        |
| <b>Functional aspects of social relationships</b>     |           |                                                                                       |                                                                                               |
| <b>Satisfaction with overall social support</b>       |           |                                                                                       |                                                                                               |
| Satisfied                                             | Reference | 0.00                                                                                  | 0.00                                                                                          |
| Less than satisfied                                   | Model 1   | -12.27 (-20.61--3.92)*                                                                | 2.54 (0.84-4.24)*                                                                             |
|                                                       | Model 2   | -11.31 (-19.26--3.36)*                                                                | 2.20 (0.63-3.77)*                                                                             |
|                                                       | Model 3b  | <b>-8.49 (-16.22--0.75)*</b>                                                          | <b>1.64 (0.09-3.20)*</b>                                                                      |
| <b>Satisfaction with family relationships</b>         |           |                                                                                       |                                                                                               |
| Satisfied                                             | Reference | 0.00                                                                                  | 0.00                                                                                          |
| Less than satisfied                                   | Model 1   | -15.52 (-20.52--10.53)***                                                             | 3.13 (2.04-4.22)***                                                                           |
|                                                       | Model 2   | -14.28 (-19.10--9.45)***                                                              | 2.87 (1.83-3.91)***                                                                           |
|                                                       | Model 3b  | -11.28 (-15.90--6.66)***                                                              | 2.35 (1.35-3.36)***                                                                           |
| <b>Satisfaction with contacts to friends</b>          |           |                                                                                       |                                                                                               |
| Satisfied                                             | Reference | 0.00                                                                                  | 0.00                                                                                          |
| Less than satisfied                                   | Model 1   | -18.09 (-22.58- -13.61)***                                                            | 3.89 (2.81-4.97)***                                                                           |
|                                                       | Model 2   | -16.07 (-20.63- -11.52)***                                                            | 3.44 (2.40-4.49)***                                                                           |
|                                                       | Model 3b  | -14.01 (-18.50- -9.52)***                                                             | 3.11 (2.07-4.15)***                                                                           |
| <b>Satisfaction with partner relationship</b>         |           |                                                                                       |                                                                                               |
| Subgroup: Number of observations                      |           |                                                                                       |                                                                                               |
| Satisfied                                             | Reference | 0.00                                                                                  | 0.00                                                                                          |
| Less than satisfied                                   | Model 1   | -11.03 (-16.76- -5.31)***                                                             | 10.13 (3.22-31.86)***                                                                         |
|                                                       | Model 2   | -12.21 (-17.48- -6.94)***                                                             | 11.65 (3.64-37.32)***                                                                         |
|                                                       | Model 3b  | -9.93 (-15.60- -4.25)**                                                               | <b>7.37 (2.22-24.44)**</b>                                                                    |

\*  $p \leq 0.05$ ; \*\*  $p \leq 0.01$ ; \*\*\*  $p \leq 0.001$ .  $P$  values from unrestricted fraction missing information tests.

Model 1: Unadjusted.

Model 2: Adjusted for sex, age, level and degree of lesion, etiology, time since injury, chronic pain, paid employment. Not mutually adjusted for other socioeconomic or social relationship variables.

Model 3a: Model 2 additionally adjusted for functional and structural aspects of social relationships.

Model 3b: Model 2 additionally adjusted for socioeconomic conditions.

Note: Predictors imputed by multiple imputation, outcome variables full case only. All analyses weighted by inverse probability weights. **Bold** results indicate deviations from the main results displayed in Table 3.

Abbreviations: HADS-D: Hospital Anxiety and Depression Scale, depression subscale; MHI-5: 5-item Mental Health Inventory of SF-36.
